# Supplementary material for: A comparison of homopolymer and block copolymer structure in 6FDA-based polyimides
Source: Royal Society of Chemistry journal article supplement (doi:10.1039/c4cp03039g), 2014-01-01
Supplement: c4cp03039g1.pdf [file c4cp03039g1.pdf]

## SUPPLEMENTARY MATERIAL

### **A comparison of homopolymer and block copolymer structure in 6FDA-based polyimides**

**Ioannis Tanis<sup>a\*</sup>, David Brown<sup>a\*</sup>, Sylvie J. Neyertz<sup>a</sup>, Romain Heck<sup>b</sup>, Régis Mercier<sup>b</sup>**

*<sup>a</sup>Univ. Savoie, LEPMI, F-73000 Chambéry, France, CNRS, LEPMI, F-38000 Grenoble, France*

*LMOPS – Bât. IUT, Campus de Savoie -Technolac, F-73376 Le Bourget-du Lac Cedex, France*

*<sup>b</sup>IMP, UMR 5223, CNRS – Université Claude Bernard Lyon1, Bât. Raulin 5eme, 2 Rue V. Grignard, 69622 Villeurbanne Cedex*

Partial charges were extracted via *ab initio* calculations at the B3LYP/6-31G\*\* level for representative three-fragment structures based on the 6FDA dianhydride and the mPDA and durene diamines. The terms 6FDA\_end, mPDA\_end and durene\_end stand for terminating groups.

| 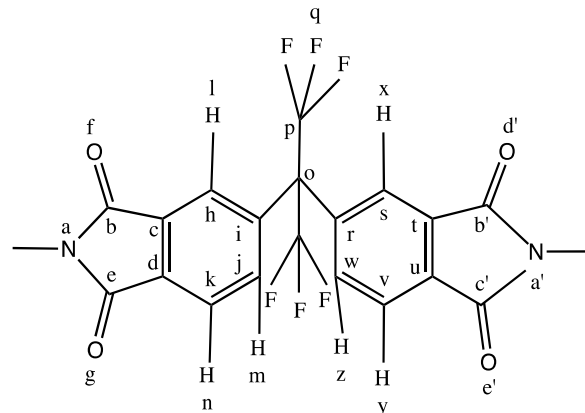<br>6FDA | a       | b      | c       | d       | e      | f       | g       | h       | i       | j       | k       |
|-------------------------------------------------------------------------------------------|---------|--------|---------|---------|--------|---------|---------|---------|---------|---------|---------|
| mPDA-6FDA-mPDA                                                                            | -0.4475 | 0.6015 | -0.0866 | -0.0963 | *      | *       | -0.4522 | -0.1499 | 0.2291  | -0.1488 | -0.0964 |
| durene-6FDA-durene                                                                        | 0.3200  | 0.3900 | -0.1437 | -0.1541 | *      | *       | -0.4192 | -0.0667 | 0.2690  | -0.2098 | -0.0112 |
| mPDA-6FDA-durene                                                                          | -0.3940 | 0.5944 | -0.0344 | -0.1361 | *      | *       | -0.4308 | -0.1911 | 0.2851  | -0.1522 | -0.0419 |
|                                                                                           | l       | m      | n       | o       | p      | q       | r       | s       | t       | u       | v       |
| mPDA-6FDA-mPDA                                                                            | 0.1331  | 0.1420 | 0.1395  | -0.4088 | 0.3855 | -0.1085 | *       | *       | *       | *       | *       |
| durene-6FDA-durene                                                                        | 0.1169  | 0.1462 | 0.1224  | -0.5242 | 0.3704 | -0.1014 | *       | *       | *       | *       | *       |
| mPDA-6FDA-durene                                                                          | 0.1413  | 0.1500 | 0.1401  | -0.5686 | 0.4292 | -0.0992 | 0.2851  | -0.0195 | -0.1574 | -0.1361 | -0.0419 |
|                                                                                           | w       | x      | y       | z       | a'     | b'      | c'      | d'      | e'      |         |         |
| mPDA-6FDA-mPDA                                                                            | *       | *      | *       | *       | *      | *       | *       | *       | *       |         |         |
| durene-6FDA-durene                                                                        | *       | *      | *       | *       | *      | *       | *       | *       | *       |         |         |
| mPDA-6FDA-durene                                                                          | -0.1522 | 0.1413 | 0.1401  | 0.1500  | 0.1820 | 0.4628  | *       | *       | -0.4181 |         |         |

**Table S1.** Partial charges for 6FDA fragment.

|                                                                                                                                  |         |        |         |   |   |         |        |        |   |        |
|----------------------------------------------------------------------------------------------------------------------------------|---------|--------|---------|---|---|---------|--------|--------|---|--------|
| 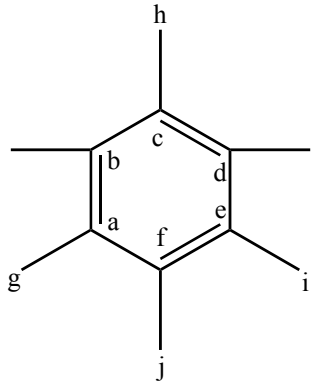 <p style="text-align: center;"><b>mPDA</b></p> | a       | b      | c       | d | e | f       | g      | h      | i | J      |
| 6FDA-mPDA-6FDA                                                                                                                   | -0.3793 | 0.4667 | -0.4975 | * | * | -0.0508 | 0.1893 | 0.2387 | * | 0.1098 |

**Table S2.** As table S1 for mPDA fragment.

|                                                                                                                                     |         |        |   |   |   |   |         |        |
|-------------------------------------------------------------------------------------------------------------------------------------|---------|--------|---|---|---|---|---------|--------|
| 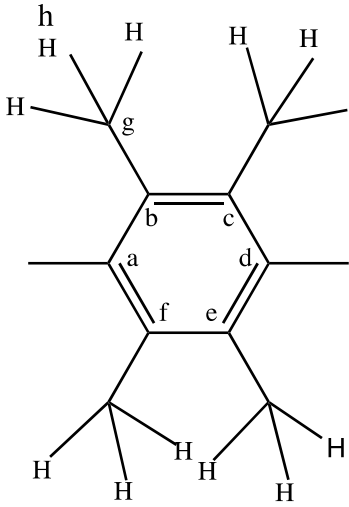 <p style="text-align: center;"><b>durene</b></p> | a       | b      | c | d | e | f | g       | h      |
| 6FDA-durene-6FDA                                                                                                                    | -0.4137 | 0.1693 | * | * | * | * | -0.2926 | 0.0876 |

**Table S3.** As table S1 for durene fragment.

|                                                                                                                                      |         |        |         |        |         |         |        |        |        |        |
|--------------------------------------------------------------------------------------------------------------------------------------|---------|--------|---------|--------|---------|---------|--------|--------|--------|--------|
| 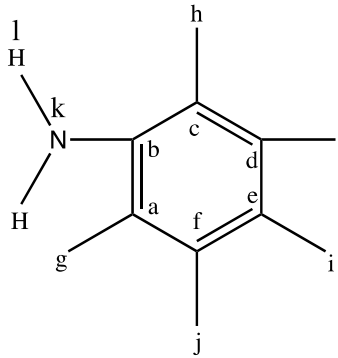 <p style="text-align: center;"><b>mPDA_end</b></p> | a       | b      | c       | d      | e       | f       | g      | h      | i      | j      |
| <b>mPDA_end-6FDA-mPDA</b>                                                                                                            | -0.3289 | 0.4834 | -0.4746 | 0.4020 | -0.3559 | -0.0176 | 0.1632 | 0.2099 | 0.1764 | 0.1230 |
|                                                                                                                                      | k       | l      |         |        |         |         |        |        |        |        |
|                                                                                                                                      | -0.7895 | 0.3250 |         |        |         |         |        |        |        |        |

**Table S4.** As table S1 for mPDA\_end fragment.

|                                                                                                                                         |         |        |         |         |   |   |         |        |
|-----------------------------------------------------------------------------------------------------------------------------------------|---------|--------|---------|---------|---|---|---------|--------|
| 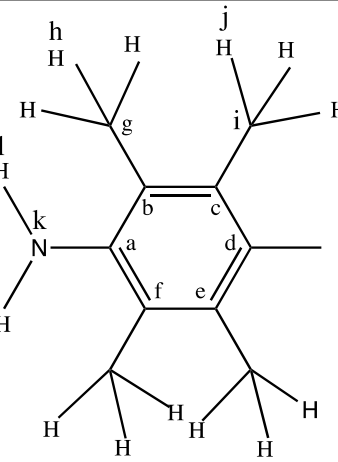 <p style="text-align: center;"><b>durene_end</b></p> | a       | b      | c       | d       | e | f | g       | h      |
| <b>durene_end-6FDA-durene</b>                                                                                                           | 0.3007  | 0.0132 | 0.1518  | -0.6036 | * | * | -0.3173 | 0.0966 |
|                                                                                                                                         | i       | j      | k       | l       |   |   |         |        |
|                                                                                                                                         | -0.3034 | 0.0981 | -0.8647 | 0.3490  |   |   |         |        |

**Table S5.** As table S1 for durene\_end fragment.

| 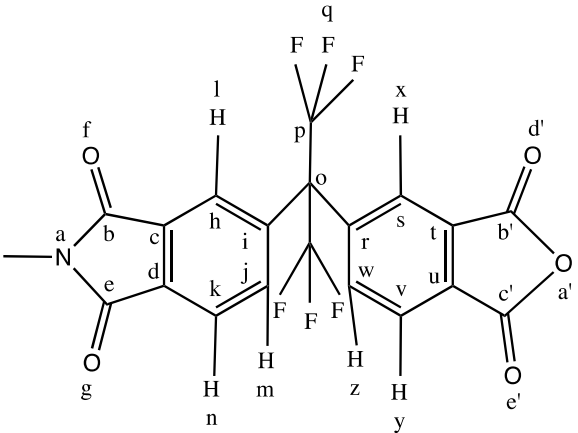<br><b>6FDA_end</b> | a       | b      | c       | d       | e       | f       | g       | h       | i       | j       | k       |
|------------------------------------------------------------------------------------------------------|---------|--------|---------|---------|---------|---------|---------|---------|---------|---------|---------|
| <b>6FDA-mPDA-6FDA end</b>                                                                            | -0.4054 | 0.5418 | -0.0342 | -0.1307 | 0.5915  | -0.4244 | -0.4489 | -0.1945 | 0.2658  | -0.1543 | -0.0877 |
| <b>6FDA-durene-6FDA end</b>                                                                          | -0.3932 | 0.5571 | -0.0219 | -0.1185 | 0.6068  | -0.4141 | -0.4379 | -0.1822 | 0.2781  | -0.1420 | -0.0754 |
|                                                                                                      | l       | m      | n       | o       | p       | q       | r       | s       | t       | u       | v       |
| <b>6FDA-mPDA-6FDA end</b>                                                                            | 0.1380  | 0.1448 | 0.1388  | -0.5365 | 0.4526  | -0.1212 | 0.3258  | -0.1749 | -0.0839 | -0.1566 | -0.0985 |
| <b>6FDA-durene-6FDA end</b>                                                                          | 0.1503  | 0.1571 | 0.1511  | -0.5243 | 0.4648  | -0.1089 | 0.3381  | -0.1626 | -0.0717 | -0.1443 | -0.0863 |
|                                                                                                      | w       | x      | y       | z       | a'      | b'      | c'      | d'      | e'      |         |         |
| <b>6FDA-mPDA-6FDA end</b>                                                                            | -0.1335 | 0.1293 | 0.1450  | 0.1308  | -0.4282 | 0.6771  | 0.700   | -0.4241 | -0.4318 |         |         |
| <b>6FDA-durene-6FDA end</b>                                                                          | -0.1212 | 0.1415 | 0.1573  | 0.1430  | -0.4159 | 0.6864  | 0.7153  | -0.4132 | -0.4208 |         |         |

**Table S6.** As table S1 for 6FDA\_end fragment.
